# Supplementary material for: Padlock Probe-Based Generation of DNAzymes for the Colorimetric Detection of Antibiotic Resistance Genes
Source: MDPI journal article supplement (doi:10.3390/ijms222413654), 2021-12-20
Supplement: s1 [file s1]

Supplementary information

**Padlock probe-based generation of DNAzymes for the colorimetric detection of  
antibiotic resistance genes**

*Rick Conzemius, Ariadne Haunold, and Ivan Barišić*







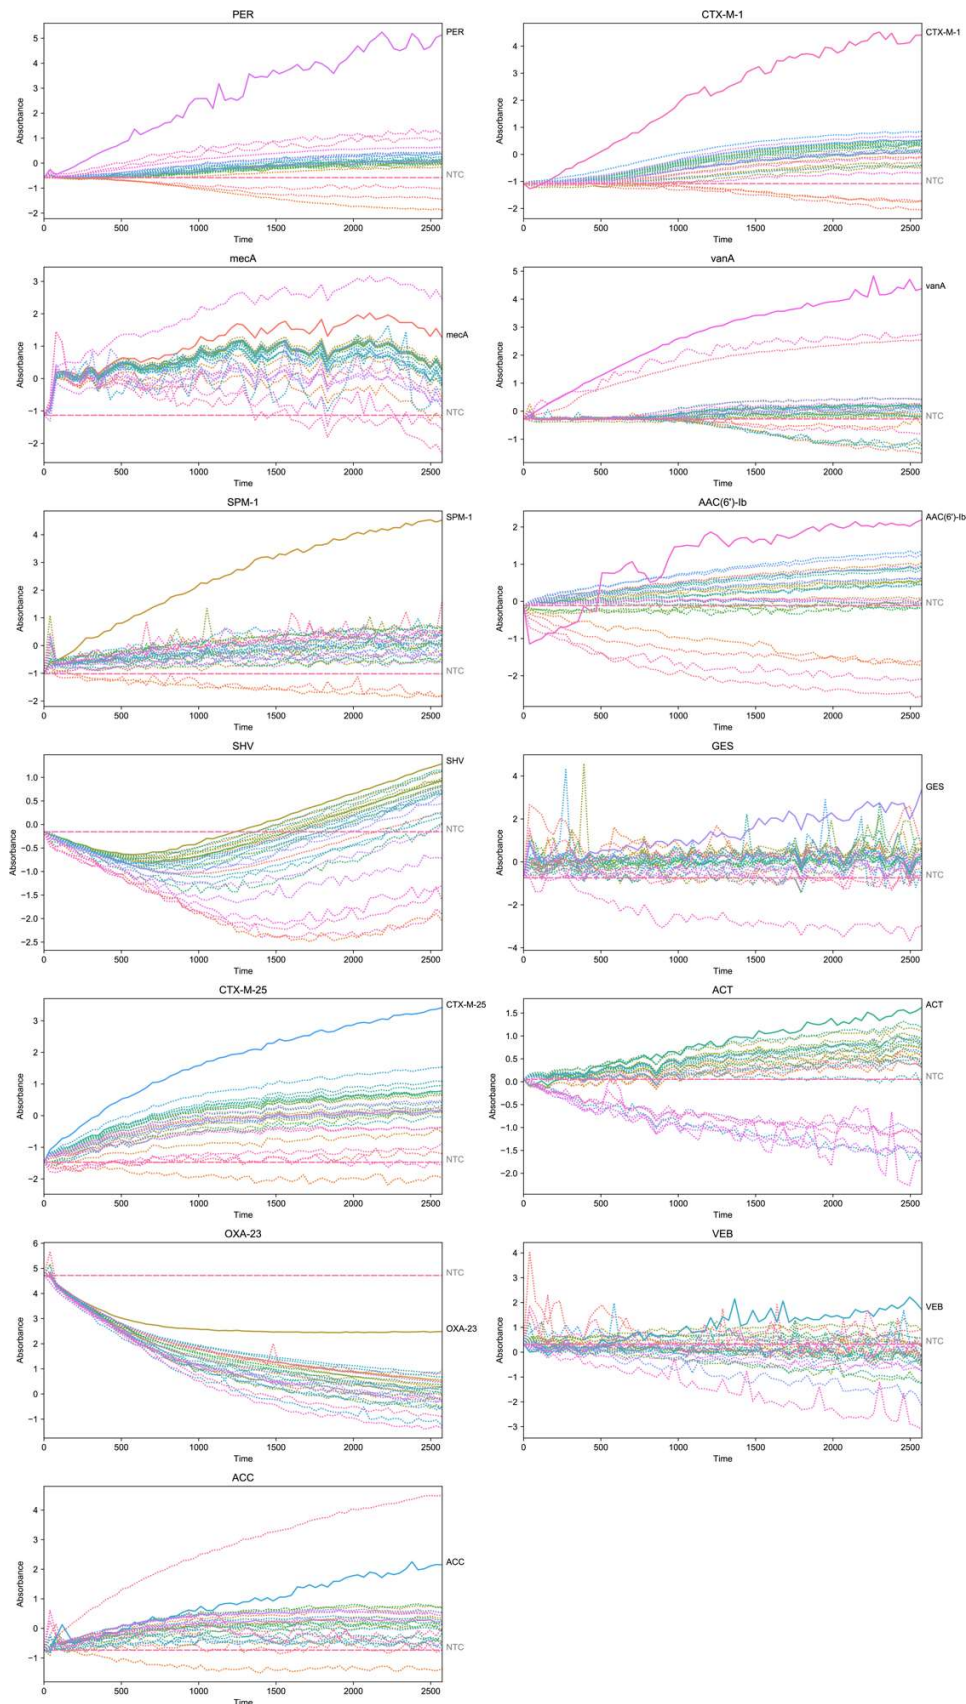

**Supplementary Figure S1 (cont'd).** Specificity evaluation of the padlock probes with synthetic DNA. The padlock probes were ligated, amplified, and finally, the conversion of the ABTS chromophore by the G-quadruplex DNAses was measured. The data was normalized to the first time point and the 'no probe control'. The curve was smoothened using a rolling average (window: 5 data points).



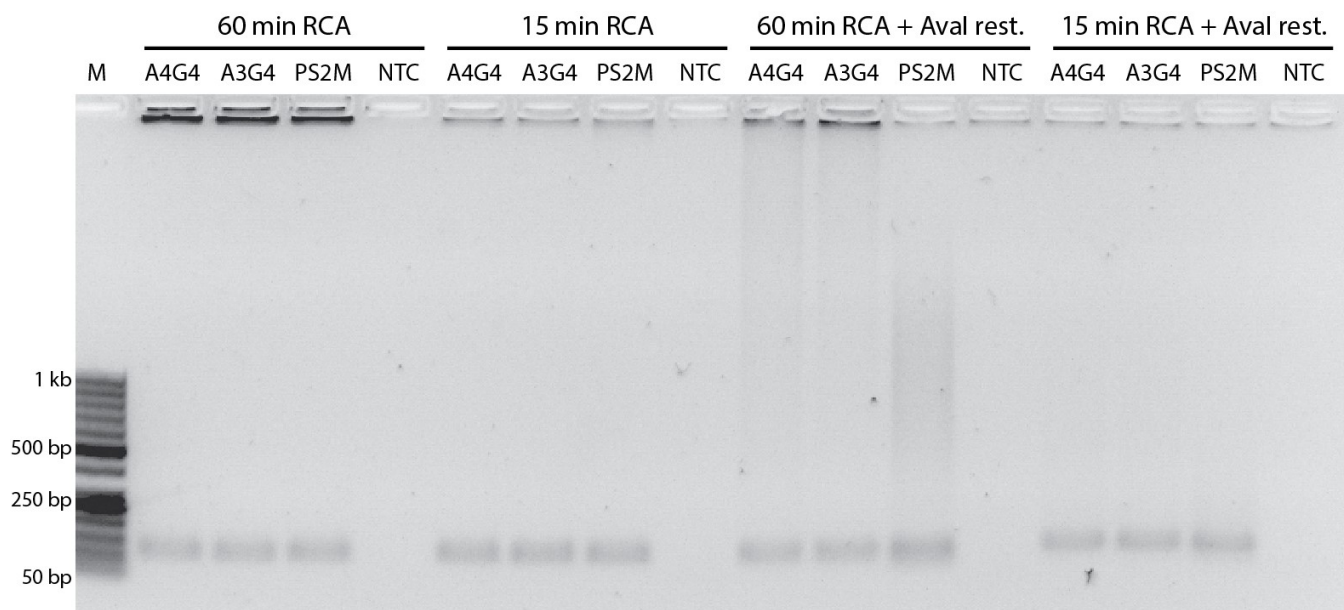

**Supplementary Figure S2.** Verification of the RCA and restriction digestion by Aval. The agarose gel shows the successful amplification of the CTX-M-1 gene after A) a RCA of 60 min, B) a RCA of 15 min, C) a RCA of 60 min followed by Aval restriction, and D) a RCA of 15 min followed by Aval restriction. The labels above the gel pockets represent different G-quadruplex DNAzyme sequences which were evaluated. The final design used in this publication is A4G4.



**Supplementary Table S1.** G-quadruplex padlock probes. Each padlock probe consists of the sequence 1, insert 1, filler, insert 2 and sequence 2; all sequences are in the 5'-3' order. The insert 1 sequence corresponds to ACTACTTACCTCGGGC, and the insert 2 sequence corresponds to TTTTCCCCTTTTCCCCTTTTCCCCTTTTCCCC.

| Name       | Sequence 1                | Filler | Sequence 2                | Tm 1<br>[°C] | Tm 2<br>[°C] | Length<br>[nt] | 5'<br>offset |
|------------|---------------------------|--------|---------------------------|--------------|--------------|----------------|--------------|
| AAC(6')-Ib | CGCTTCCAAGAGCAACG         |        | TCCCACCATCCGTCCC          | 61           | 62           | 81             | 11           |
| ACC        | GGGGATCGTGATGCTGG         |        | CGTTTGTTCCTGCTAAGAAGAT    | 61           | 61           | 87             | 20           |
| ACT        | CGCCAACGCCAGCA            |        | TGGCACAACGCGTCTTTA        | 61           | 62           | 80             | 13           |
| aph2       | GCATAAGGCGCCGGA           |        | GGCAGGAAGGTATTAATAACTATCA | 62           | 62           | 90             | 18           |
| CMY        | GCGCTTCCCGCCG             | A      | AGCAAAGTGGCATTGGCA        | 61           | 63           | 80             | 5            |
| CTX-M-1    | TGCGCATACAGCGGC           | C      | CTGTACGTCCGCGGTT          | 62           | 61           | 80             | 9            |
| CTX-M-25   | CGCCGCTACCGCC             |        | CGTTTCACTTTGCTTAAGCAC     | 60           | 61           | 82             | 12           |
| CTX-M-9    | GCCGCTGGTTCTGGT           | TTG    | CCGCAGGGTCTGTC            | 60           | 61           | 80             | 21           |
| DHA        | GCGGTTTCTGTGGCGA          |        | TCACAGGTGTGCTGGGT         | 62           | 62           | 81             | 8            |
| GES        | CTACGAGCGGGTTTTCTT        |        | AACGGGAGACGCGACA          | 61           | 62           | 82             | 17           |
| GIM        | GGTAGTTCTTGATAATAATCAAGCC |        | GGTTAGTTGATTGCAATGGGT     | 62           | 61           | 95             | 19           |
| IMI        | AATCGTTCAATTTGCTTTGTACGA  |        | GCCTTTGAAAGAACTACATAATGGA | 62           | 62           | 96             | 11           |
| IMP        | ATAGATCGAGAATTAAGCCACTCT  |        | TTCAGATGCATACGTGGGG       | 62           | 62           | 91             | 5            |
| mecA       | AGTTGAACCTGGTGAAGTTGT     |        | CCCAATCATTGCTGTTAATTTTTTG | 62           | 62           | 96             | 15           |
| MOX        | GGCGAGTTATGCCTATGGC       |        | GCCGAAGCAGGCCAT           | 63           | 61           | 82             | 19           |
| OXA-1      | AGAACCTTACAAAACGGATGGT    |        | GTGCAGGATTCACAGCAAAT      | 63           | 61           | 90             | 17           |
| OXA-10     | TGCGACACCAGGATTTGAC       |        | CCCACCCAAACCCACCA         | 63           | 63           | 83             | 20           |
| OXA-23     | ATATGTGCCAGCCTCTACATTT    |        | AAGCCGCGCAAATACAGA        | 62           | 62           | 88             | 22           |
| OXA-24     | ACTCCACAGGTAGGTTGGT       |        | GGATGGGGAATGGGTGTT        | 62           | 61           | 85             | 7            |
| PER        | TGCAGCAGTTGCTGCA          |        | GTGTGCGAGACCGAGTAT        | 62           | 61           | 82             | 16           |
| qnrB       | AACTCGCCGCCGGA            |        | CGCCAGTCGAAAGTCGAA        | 62           | 62           | 80             | 20           |
| qnrS       | CGGGAAAAGTTGGCACCT        |        | ACTTGATGGGCAAAGTTTGT      | 62           | 61           | 87             | 12           |
| SHV        | GGGTGCGCGCGG              | CACTGA | GGAGCTGGCGAGCG            | 61           | 61           | 80             | 18           |
| SPM-1      | CCGCGCCCATCTTCTT          |        | TCGCTCGACCACGTCT          | 61           | 62           | 80             | 4            |
| TEM        | GTGATAACACTGCGGCCA        |        | AGTGCTGCCATAACCATGA       | 62           | 61           | 85             | 13           |
| vanA       | GGTCTAGCCCGTGTGGA         |        | AGCGCTCGGCTGTAGA          | 62           | 62           | 81             | 20           |
| VEB        | CCACGTTTTAGGCAAAAGGT      |        | GGGAATTCCTCTTTAATCGGACT   | 61           | 63           | 91             | 5            |



**Supplementary Table S2.** Primer set targeting antibiotic resistance genes.

| Gene      | Forward primer (5'-3')     | Reverse primer (5'-3')  | Size |
|-----------|----------------------------|-------------------------|------|
| AAC(6)-Ib | GCCCCAGTCGTACGTTGC         | CTTTGCCCAGTTGTGATGC     | 112  |
| AAD       | GATGAGCGAAATGTAGTG         | GGCAGCGACATCCTTCG       | 84   |
| ACC       | CCGATTGTTCCCCGTTA          | GATTGAGTAGTTTTTGTAGCCA  | 141  |
| ACT       | GGATGAGGTCACGGATA          | CCAAAAAGACCGATGCT       | 111  |
| aph2      | TTTRTGCTTGCTGGATTGTA       | TGCTTTTCTTTCTGCTACTTC   | 106  |
| ccrA      | CACAGAAAAGCGTAAAAATA       | GCGAGGGATACATAAGT       | 79   |
| cepA      | AGACTTATACATTTATCCATTATC   | TATTTCCGGCTTTTTTCCC     | 117  |
| CMY       | TATGTACCAGGGATTAGGCTG      | CTCAACGGCGGGAAGC        | 109  |
| CTX-M-1   | AGGAAGTGTGCCGCTGT          | AATTATCTGCTGTGTTAATCA   | 113  |
| CTX-M-2   | TGCCGAAATCATGGGTAG         | GGTTGGGTAAAGTAGGTCAC    | 124  |
| CTX-M-25  | CAGTAAAGTGATGGCGGTA        | AATGGGGTTGTAGTTAATC     | 112  |
| CTX-M-9   | ACTACGGCACCAACCAATG        | TGCGGCTGGGTAAAATAG      | 85   |
| DHA       | TAAGCCCTATTATTTCAATTATG    | CTCTTTTTTCGCCACAG       | 139  |
| DIM       | GTACATTGGATTTCGTAATAAT     | CGTAGAAATTGATTGGTCA     | 111  |
| ermB      | ATCTATTCAACTATCGTCAGA      | TCCCAACAATTTTATACCTCT   | 114  |
| ermF      | AATTAGAACCACACAAAAGTTAT    | ACCTACCTCATAGACAAG      | 101  |
| FOX       | SAAAGGTTCCGCCTT            | GCATCTTGTCATTGCAATC     | 107  |
| GES       | CACCTCGACCCACACCA          | CCAACAACCCAATCTTT       | 93   |
| GIM       | AAGTTATAAAAAATTGAAGATGGAGT | AAGGTGTGTCGATAATATAGGCT | 129  |
| IMI       | GYAAATCATTTTCRTACARAGCA    | GTGATGGGTGAATRGAAC      | 163  |
| IMP       | GGAATAGAGTGGCTTAATT        | AACTTCAATTTTATTTTAACTAG | 144  |
| KPC-2     | TCTAGTTCTGCTGTCTTGTC       | AGTCCTGTTGAGTTTAG       | 101  |
| MCR-1     | CTCCAAAATGCCCTACAGA        | CTTAACAAAAGCCACAAG      | 117  |
| mecA      | AACAAGTTCCAGATTACAAC       | GCCAACCTTTACCATCG       | 121  |
| mecC      | GTTCCATACCATTAGTTAATATAT   | GCTTTAGAAAATAACGGAAATAT | 121  |
| MOX       | TGCACCACACCTATGTC          | GCTTGTCTCTTTCTGA        | 75   |
| NDM       | CAGCACACTTCCTATCTCG        | GGTCCAGGCGGTATCGA       | 102  |
| OXA-1     | GAAAAACACCATAGAGAACA       | TATAATAAACCTTCAAACCA    | 126  |
| OXA-10    | TTTTCTGGTGTGGGAAGTGAAG     | GATTTTGGTGGGAATGGATTTC  | 150  |
| OXA-23    | TTCAAACAGATAAAAAAATTAATC   | CGATCAGGGCATTCAACATT    | 102  |
| OXA-24    | ACTCAAGAAGAAGTTAAAAAATG    | CCAGTCAACCAACCTACCT     | 113  |
| OXA-48    | GTATCACAATAAGTTACACGT      | CCAGTTTTAGCCCGAATAAT    | 102  |
| OXA-58    | TGCCTTTTAAACCTGAAGT        | TTTTCAACAAAACCCACATACCA | 142  |
| PER       | GAGTTTAGTGTTCAGTGC         | GTCTCCTTTATACCCATAGAC   | 140  |
| qnrA      | TATCAGTGTGACTTCAGCC        | CCTTGAACTGGCATCGC       | 127  |
| qnrB      | CGTTCAGTGGTTCAGATCT        | AATTGGTCAGATCGCAATG     | 87   |
| qnrS      | GTGTGATTTAAAGGKGCC         | CCKCTCCATATTGGCATA      | 121  |
| SHV       | TGCAGTGGATGGTGGAC          | CCAAGCAGGGCGACAAT       | 127  |
| SPM-1     | TTACAAGAAGATGGGCG          | AACAGGATGGGAACCTCAGAATC | 145  |
| TEM       | CGCCGCATACACTATTCTC        | GTCAGAAGTAAGTTGGC       | 143  |
| tetQ      | GTAGAAGATATGGAAGATTTTC     | GACGGAGGATTTGAGAG       | 102  |
| vanA      | CGGAAAAAGGCTCWGAA          | CGTTATCTTGTAACAAACATATC | 150  |
| vanB      | GGTAAAAATCCGCAATAGAAAT     | CTTCCCATTCCGTACAT       | 122  |
| VEB       | TCAAGACCTTTTGCTAAA         | AAGAATTTTGAACAGAATCAGT  | 168  |
| VIM       | GGTCTACCCGTCCAATGG         | CCGCTGTGTTTTTCGCA       | 86   |



**Supplementary Table S3.** Single-stranded synthetic targets complementary to the G-quadruplex padlock probes.

| Name           | Target sequence (5'-3')                          |
|----------------|--------------------------------------------------|
| AAC(6')-lb_tar | GGGACGGATGGTGGGACGTTGCTCTTGGAAGCG                |
| ACC_tar        | ATCTTCTTAGCAGGAACAAACGCCAGCATCACGATCCCC          |
| ACT_tar        | TAAAGACGCGTTGTGCCATGCTGGCGTTGGCG                 |
| aph2_tar       | TGATAGTATTTTAATACCTTCCTGCCTTCCGGCGCCTTATGC       |
| CMY_tar        | TGCCAATGCCACTTTGCTCGGCGGGAAGCGC                  |
| CTX-M-1_tar    | AACGGCGGACGTACAGGCCGCTGTATGCGCA                  |
| CTX-M-25_tar   | GTGCTTAAGCAAAGTGAAACGGGCGGTAGCGGCG               |
| CTX-M-9_tar    | GCACGACCCTGCGGACCAGAACCAGCGGC                    |
| DHA_tar        | ACCCAGCACACCTGTGATCGCCACAGAAACCGC                |
| GES_tar        | TGTCGCGTCTCCCGTTAGGAAAACCCGCTCGTAG               |
| GIM_tar        | AACCCATTGCAATCAACTAACCGGCTTGATTATTATCCAGAACTACC  |
| IMI_tar        | TCCATTATGTAGTTCTTTCAAAGGCTCGTACAAAGCAAATGAACGATT |
| IMP_tar        | CCCCACGTATGCATCTGAAAGAGTGGCTTAATTCTCGATCTAT      |
| mecA_tar       | CAAAAAATATTAACAGCAATGATTGGGACAACTTCACCAGGTTCAACT |
| MOX_tar        | ATGGCCTGCTTCGGCGCCATAGGCATAACTCGCC               |
| OXA-1_tar      | ATTTGCTGTGAATCCTGCACACCATCCGTTTTGTAAGGTTCT       |
| OXA-10_tar     | TGGTGGGTTGGGTGGGGTCAAATCCTGGTGTGCA               |
| OXA-23_tar     | TCTGTATTTGCGCGGCTTAAATGTAGAGGCTGGCACATAT         |
| OXA-24_tar     | AACACCCATTCCCATCCACCAACCTACCTGTGGAGT             |
| PER_tar        | ATACTCGGTCTCGCACACTGCAGCAACTGCTGCA               |
| qnrB_tar       | TTCGACTTTGACTGGCGTCCGGCGGCGAGTT                  |
| qnrS_tar       | AGCAAACCTTGCCAATCAAGTGGGGCCAACCTTTCCCG           |
| SHV_tar        | CCGCTCGCCAGCTCCCCGCGCGCACC                       |
| SPM-1_tar      | AGACGTGGTCGAGCGAAAGAAGATGGGCGCGG                 |
| TEM_tar        | TCATGGTTATGGCAGCACTTGCCCGCAGTGTTATCAC            |
| vanA_tar       | TCTACAGCCGAGCGCTTCCACACGGGCTAGACC                |
| VEB_tar        | AGTCCGATTAAAGAGGAATTCCCACCTTTTGCCATAAACGTGG      |

**Supplementary Table S4.** Additional primers.

| Name                    | Sequence (5'-3') |
|-------------------------|------------------|
| Padlock probe primer    | GCCCGAGGTAAGTAGT |
| Padlock probe primer RC | ACTACTTACCTCGGGC |
